# Supplementary material for: Light-Dependent Nitrate Removal Capacity of Green Microalgae
Source: MDPI journal article supplement (doi:10.3390/ijms24010077), 2022-12-21
Supplement: s1 [file s1]

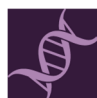

**Table S1.** Total nitrate removal by *Chlamydomonas* sp. MACC-216 under various light conditions in TAP-N5 and TAP-N10 media. Values are represented as mean  $\pm$  standard deviation.

| Light condition    | Total nitrate removal<br>in TAP-N5 medium<br>(mM) | Total nitrate removal<br>in TAP-N10 medium<br>(mM) |
|--------------------|---------------------------------------------------|----------------------------------------------------|
|                    |                                                   |                                                    |
| Blue 50            | 4.25 $\pm$ 0.07 <sup>c</sup>                      | 4.71 $\pm$ 0.33 <sup>g</sup>                       |
| Blue 100           | 5 $\pm$ 0.0 <sup>a</sup>                          | 5.27 $\pm$ 0.07 <sup>fg</sup>                      |
| Blue 250           | 5 $\pm$ 0.0 <sup>a</sup>                          | 7.76 $\pm$ 0.31 <sup>c</sup>                       |
| Blue 25 + Red 25   | 4.61 $\pm$ 0.09 <sup>b</sup>                      | 4.52 $\pm$ 0.21 <sup>g</sup>                       |
| Blue 50 + Red 50   | 5 $\pm$ 0.0 <sup>a</sup>                          | 6.83 $\pm$ 0.05 <sup>d</sup>                       |
| Blue 125 + Red 125 | 5 $\pm$ 0.0 <sup>a</sup>                          | 9.64 $\pm$ 0.3 <sup>a</sup>                        |
| Red 50             | 4.68 $\pm$ 0.08 <sup>b</sup>                      | 4.44 $\pm$ 0.37 <sup>g</sup>                       |
| Red 100            | 5 $\pm$ 0.0 <sup>a</sup>                          | 6.24 $\pm$ 0.1 <sup>de</sup>                       |
| Red 250            | 5 $\pm$ 0.0 <sup>a</sup>                          | 8.92 $\pm$ 0.41 <sup>b</sup>                       |
| White 50           | 4.05 $\pm$ 0.08 <sup>d</sup>                      | 4.60 $\pm$ 0.02 <sup>g</sup>                       |
| White 100          | 5 $\pm$ 0.0 <sup>a</sup>                          | 5.78 $\pm$ 0.23 <sup>ef</sup>                      |
| White 250          | 5 $\pm$ 0.0 <sup>a</sup>                          | 8.69 $\pm$ 0.08 <sup>b</sup>                       |

Superscript lowercase letters signify statistical differences ( $P < 0.05$ ) as determined by Tukey's-test. Tukey's-test was done for each nitrate concentration separately.

**Table S2.** Values of total nitrate removal and nitrate reductase activity under various light conditions in SWW. Values are represented as mean  $\pm$  standard deviation.

| Light condition    | Total nitrate removal<br>(mM) | Nitrate reductase activity<br>[NO <sub>2</sub> <sup>-</sup> formed ( $\mu$ mol g <sup>-1</sup> of FW min <sup>-1</sup> )] |
|--------------------|-------------------------------|---------------------------------------------------------------------------------------------------------------------------|
| Blue 250           | 3.51 $\pm$ 0.13 <sup>b</sup>  | 18.47 $\pm$ 0.91 <sup>c</sup>                                                                                             |
| Blue 125 + Red 125 | 4.22 $\pm$ 0.05 <sup>a</sup>  | 31.09 $\pm$ 1.48 <sup>a</sup>                                                                                             |
| Red 250            | 3.67 $\pm$ 0.09 <sup>b</sup>  | 28.41 $\pm$ 0.48 <sup>ab</sup>                                                                                            |
| White 250          | 3.60 $\pm$ 0.19 <sup>b</sup>  | 25.4 $\pm$ 1.04 <sup>b</sup>                                                                                              |

FW: Fresh weight

Superscript lowercase letters signify statistical differences ( $P < 0.05$ ) as determined by Tukey's-test.

**Table S3.** Values of the relative gene expression of *NRT1*, *NRT2.1*, *NRT2.2*, *NIA*, and *MCP* in *Chlamydomonas* sp. MACC-216 grown under various light conditions in SWW. Values are represented as mean  $\pm$  standard deviation.

| Gene          | Relative gene expression     |                              |                              |                              |
|---------------|------------------------------|------------------------------|------------------------------|------------------------------|
|               | Blue 250                     | Blue 125 + Red 125           | Red 250                      | White 250                    |
| <i>NRT1</i>   | 1.43 $\pm$ 0.23 <sup>b</sup> | 6.0 $\pm$ 1.7 <sup>a</sup>   | 2.36 $\pm$ 0.08 <sup>b</sup> | 1.01 $\pm$ 0.22 <sup>b</sup> |
| <i>NRT2.1</i> | 1.59 $\pm$ 0.32 <sup>b</sup> | 6.0 $\pm$ 1.9 <sup>a</sup>   | 1.93 $\pm$ 0.29 <sup>b</sup> | 1.21 $\pm$ 0.80 <sup>b</sup> |
| <i>NRT2.2</i> | 1.43 $\pm$ 0.46 <sup>b</sup> | 5.18 $\pm$ 1.21 <sup>a</sup> | 2.32 $\pm$ 0.32 <sup>b</sup> | 1.02 $\pm$ 0.29 <sup>b</sup> |
| <i>NIA</i>    | 0.90 $\pm$ 0.11 <sup>c</sup> | 5.49 $\pm$ 0.35 <sup>a</sup> | 1.89 $\pm$ 0.29 <sup>b</sup> | 1.02 $\pm$ 0.28 <sup>c</sup> |
| <i>MCP</i>    | 1.6 $\pm$ 0.34 <sup>b</sup>  | 4.35 $\pm$ 0.28 <sup>a</sup> | 3.93 $\pm$ 0.44 <sup>a</sup> | 1.0 $\pm$ 0.10 <sup>b</sup>  |

Superscript lowercase letters signify statistical differences ( $P < 0.05$ ) as determined by Tukey's-test.

**Table S4:** Total nitrate removal by *Chlorella* sp. MACC-38 and *Chlorella* sp. MACC-360 under various light conditions in SWW. Values are represented as mean  $\pm$  standard deviation.

| Light condition    | Total nitrate removal (mM)    |                               |
|--------------------|-------------------------------|-------------------------------|
|                    | <i>Chlorella</i> sp. MACC-38  | <i>Chlorella</i> sp. MACC-360 |
| Blue 250           | 1.50 $\pm$ 0.01 <sup>ab</sup> | 0.79 $\pm$ 0.12 <sup>b</sup>  |
| Blue 125 + Red 125 | 1.67 $\pm$ 0.38 <sup>a</sup>  | 1.37 $\pm$ 0.20 <sup>a</sup>  |
| Red 250            | 0.73 $\pm$ 0.02 <sup>b</sup>  | 0.44 $\pm$ 0.05 <sup>b</sup>  |
| White 250          | 0.88 $\pm$ 0.14 <sup>ab</sup> | 0.46 $\pm$ 0.07 <sup>b</sup>  |

Superscript lowercase letters signify statistical differences ( $P < 0.05$ ) as determined by Tukey's-test.
